# Supplementary material
Source: HighWire-hosted journal article supplement (http://erj.ersjournals.com/highwire/filestream/127849/field_highwire_adjunct_files/1/ERJ-00745-2015_Supplementary_material_2.pdf)
Supplement: ERJ-00745-2015_Supplementary_material_2.pdf [file ERJ-00745-2015_Supplementary_material_2.pdf]

## ONLINE SUPPLEMENT II (references figures main text)

### Figure 1. Absolute and relative changes in $t_{LIM}$ in cycle-ergometer studies with non-pharmacological interventions in COPD patients

1. Bianchi L, Foglio K, Pagani M, Vitacca M, Rossi A and Ambrosino N. Effects of proportional assist ventilation on exercise tolerance in COPD patients with chronic hypercapnia. *Eur Respir J* 11: 422-427, 1998.
2. Blanco I, Santos S, Gea J, Guell R, Torres F, Gimeno-Santos E, Rodriguez DA, Vilaro J, Gomez B, Roca J and Barbera JA. Sildenafil to improve respiratory rehabilitation outcomes in COPD: a controlled trial. *Eur Respir J* 42: 982-992, 2013.
3. Borghi-Silva A, Carrascosa C, Oliveira CC, Barroco AC, Berton DC, Vilaca D, Lira-Filho EB, Ribeiro D, Nery LE and Neder JA. Effects of respiratory muscle unloading on leg muscle oxygenation and blood volume during high-intensity exercise in chronic heart failure. *Am J Physiol Heart Circ Physiol* 294: H2465-H2472, 2008.
4. Butcher SJ, Lagerquist O, Marciniuk DD, Petersen SR, Collins DF and Jones RL. Relationship between ventilatory constraint and muscle fatigue during exercise in COPD. *Eur Respir J* 33: 763-770, 2009.
5. Cambach W, Chadwick-Straver RV, Wagenaar RC, van Keimpema AR and Kemper HC. The effects of a community-based pulmonary rehabilitation programme on exercise tolerance and quality of life: a randomized controlled trial. *Eur Respir J* 10: 104-113, 1997.
6. Chiappa GR, Queiroga F, Jr., Meda E, Ferreira LF, Diefenthaler F, Nunes M, Vaz MA, Machado MC, Nery LE and Neder JA. Heliox improves oxygen delivery and utilization during dynamic exercise in patients with chronic obstructive pulmonary disease. *Am J Respir Crit Care Med* 179: 1004-1010, 2009.
7. Dolmage TE and Goldstein RS. Proportional assist ventilation and exercise tolerance in subjects with COPD. *Chest* 111: 948-954, 1997.
8. Eves ND, Petersen SR, Haykowsky MJ, Wong EY and Jones RL. Helium-hyperoxia, exercise, and respiratory mechanics in chronic obstructive pulmonary disease. *Am J Respir Crit Care Med* 174: 763-771, 2006.
9. Emtner M, Porszasz J, Burns M, Somfay A, Casaburi R. Benefits of supplemental oxygen in exercise training in nonhypoxemic chronic obstructive pulmonary disease patients. *Am J Respir Crit Care Med*. 2003 1;168:1034-42.
9. Hawkins P, Johnson LC, Nikolettou D, Hamnegard CH, Sherwood R, Polkey MI and Moxham J. Proportional assist ventilation as an aid to exercise training in severe chronic obstructive pulmonary disease. *Thorax* 57: 853-859, 2002.

10. Heraud N, Prefaut C, Durand F and Varray A. Does correction of exercise-induced desaturation by O<sub>2</sub> always improve exercise tolerance in COPD? A preliminary study. *Respir Med* 102: 1276-1286, 2008.
11. Hernandez P, Maltais F, Gursahaney A, LeBlanc P and Gottfried SB. Proportional assist ventilation may improve exercise performance in severe chronic obstructive pulmonary disease. *J Cardiopulm Rehabil* 21: 135-142, 2001.
12. Laveneziana P, Valli G, Onorati P, Paoletti P, Ferrazza AM and Palange P. Effect of heliox on heart rate kinetics and dynamic hyperinflation during high-intensity exercise in COPD. *Eur J Appl Physiol* 111: 225-234, 2011.
13. Laviolette L, Bourbeau J, Bernard S, Lacasse Y, Pepin V, Breton MJ, Baltzan M, Rouleau M and Maltais F. Assessing the impact of pulmonary rehabilitation on functional status in COPD. *Thorax* 63: 115-121, 2008.
14. Louvaris Z, Zakynthinos S, Aliverti A, Habazettl H, Vasilopoulou M, Andrianopoulos V, Wagner H, Wagner P and Vogiatzis I. Heliox increases quadriceps muscle oxygen delivery during exercise in COPD patients with and without dynamic hyperinflation. *J Appl Physiol* 113: 1012-1023, 2012.
15. Louvaris Z, Vogiatzis I, Aliverti A, Habazettl H, Wagner H, Wagner P, Zakynthinos S. Blood flow does not redistribute from respiratory to leg muscles during exercise breathing heliox or oxygen in COPD. *J Appl Physiol*. 2014 ;117:267-76. PubMed PMID: 24903919.
16. O'Donnell DE, D'Arsigny C and Webb KA. Effects of hyperoxia on ventilatory limitation during exercise in advanced chronic obstructive pulmonary disease. *Am J Respir Crit Care Med* 163: 892-898, 2001.
17. O'Donnell DE, McGuire M, Samis L and Webb KA. General exercise training improves ventilatory and peripheral muscle strength and endurance in chronic airflow limitation. *Am J Respir Crit Care Med* 157: 1489-1497, 1998.
18. Oliveira CC, Carrascosa CR, Borghi-Silva A, Berton DC, Queiroga F, Jr., Ferreira EM, Nery LE and Neder JA. Influence of respiratory pressure support on hemodynamics and exercise tolerance in patients with COPD. *Eur J Appl Physiol* 109: 681-689, 2010.
19. Ong KC, Chong WF, Soh C and Earnest A. Comparison of different exercise tests in assessing outcomes of pulmonary rehabilitation. *Respir Care* 49: 1498-1503, 2004.
20. Palange P, Valli G, Onorati P, Antonucci R, Paoletti P, Rosato A, Manfredi F and Serra P. Effect of heliox on lung dynamic hyperinflation, dyspnea, and exercise endurance capacity in COPD patients. *J Appl Physiol* 97: 1637-1642, 2004.
21. Porszasz J, Cao R, Morishige R, van Eykern LA, Stenzler A, Casaburi R. Physiologic effects of an ambulatory ventilation system in chronic obstructive pulmonary disease. *Am J Respir Crit Care Med*. 2013;188:334-42.

22. Puente-Maestu L, Abad YM, Pedraza F, Sanchez G and Stringer WW. A controlled trial of the effects of leg training on breathing pattern and dynamic hyperinflation in severe COPD. *Lung* 184: 159-167, 2006.
23. Puente-Maestu L, Tena T, Trascasa C, Perez-Parra J, Godoy R, Garcia MJ and Stringer WW. Training improves muscle oxidative capacity and oxygenation recovery kinetics in patients with chronic obstructive pulmonary disease. *Eur J Appl Physiol* 88: 580-587, 2003.
24. Puente-Maestu L, Villar F, de MJ, Stringer WW, Sanz P, Sanz ML, de Pedro JG and Martinez-Abad Y. Clinical relevance of constant power exercise duration changes in COPD. *Eur Respir J* 34: 340-345, 2009.
25. Scorsone D, Bartolini S, Saporiti R, Braido F, Baroffio M, Pellegrino R, Brusasco V and Crimi E. Does a low-density gas mixture or oxygen supplementation improve exercise training in COPD? *Chest* 138: 1133-1139, 2010.
26. Siqueira AC, Borghi-Silva A, Bravo DM, Ferreira EM, Chiappa GR and Neder JA. Effects of hyperoxia on the dynamics of skeletal muscle oxygenation at the onset of heavy-intensity exercise in patients with COPD. *Respir Physiol Neurobiol* 172: 8-14, 2010.
27. van 't HA, Kwakkel G and Gosselink R. The acute effects of noninvasive ventilatory support during exercise on exercise endurance and dyspnea in patients with chronic obstructive pulmonary disease: a systematic review. *J Cardiopulm Rehabil* 22: 290-297, 2002.
28. Vogiatzis I, Louvaris Z, Habazettl H, Andrianopoulos V, Wagner H, Roussos C, Wagner PD and Zakynthinos S. Cerebral cortex oxygen delivery and exercise limitation in patients with COPD. *Eur Respir J* 41: 295-301, 2013.

**Figure 2. Absolute and percentage changes in  $t_{LIM}$  in relation to placebo in studies with short-acting  $\beta_2$ -adrenoceptor agonists (SABA), anti-muscarinics (SAMA) and their combination in COPD patients**

1. Aliverti A, Rodger K, Dellaca RL, Stevenson N, Lo MA, Pedotti A and Calverley PM. Effect of salbutamol on lung function and chest wall volumes at rest and during exercise in COPD. *Thorax* 60: 916-924, 2005.
2. Berton DC, Barbosa PB, Takara LS, Chiappa GR, Siqueira AC, Bravo DM, Ferreira LF and Neder JA. Bronchodilators accelerate the dynamics of muscle O<sub>2</sub> delivery and utilisation during exercise in COPD. *Thorax* 65: 588-593, 2010.

3. Laveneziana P, Palange P, Ora J, Martolini D and O'Donnell DE. Bronchodilator effect on ventilatory, pulmonary gas exchange, and heart rate kinetics during high-intensity exercise in COPD. *Eur J Appl Physiol* 107: 633-643, 2009.
4. O'Donnell DE, Laveneziana P, Ora J, Webb KA, Lam YM and Ofir D. Evaluation of acute bronchodilator reversibility in patients with symptoms of GOLD stage I COPD. *Thorax* 64: 216-223, 2009.
5. Oga T, Nishimura K, Tsukino M, Hajiro T, Ikeda A and Izumi T. The effects of oxitropium bromide on exercise performance in patients with stable chronic obstructive pulmonary disease. A comparison of three different exercise tests. *Am J Respir Crit Care Med* 161: 1897-1901, 2000.
6. Oga T, Nishimura K, Tsukino M and Sato S. Exercise responses during endurance testing at different intensities in patients with COPD. *Respir Med* 98: 515-521, 2004.
7. Oga T, Nishimura K, Tsukino M, Sato S, Hajiro T and Mishima M. A comparison of the effects of salbutamol and ipratropium bromide on exercise endurance in patients with COPD. *Chest* 123: 1810-1816, 2003.
8. Pepin V, Saey D, Whittom F, LeBlanc P and Maltais F. Walking versus cycling: sensitivity to bronchodilation in chronic obstructive pulmonary disease. *Am J Respir Crit Care Med* 172: 1517-1522, 2005.
9. Saey D, Debigare R, LeBlanc P, Mador MJ, Cote CH, Jobin J and Maltais F. Contractile leg fatigue after cycle exercise: a factor limiting exercise in patients with chronic obstructive pulmonary disease. *Am J Respir Crit Care Med* 168: 425-430, 2003.

**Figure 3. Absolute (panel A) and percentage (panel B) changes ( $\Delta$ ) in  $t_{LIM}$  in relation to placebo in studies with long-acting  $\beta_2$ -adrenoceptor agonists (LABA), anti-muscarinics (LAMA) and their combination in COPD patients**

1. Beeh KM, Singh D, Di SL and Drollmann A. Once-daily NVA237 improves exercise tolerance from the first dose in patients with COPD: the GLOW3 trial. *Int J Chron Obstruct Pulmon Dis* 7: 503-513, 2012.
2. Canto ND, Ribeiro JP, Neder JA and Chiappa GR. Addition of tiotropium to formoterol improves inspiratory muscle strength after exercise in COPD. *Respir Med* 106: 1404-1412, 2012.
3. Casaburi R, Kukafka D, Cooper CB, Witek TJ, Jr. and Kesten S. Improvement in exercise tolerance with the combination of tiotropium and pulmonary rehabilitation in patients with COPD. *Chest* 127: 809-817, 2005.
4. Cooper CB, Celli BR, Jardim JR, Wise RA, Legg D, Guo J and Kesten S. Treadmill endurance during 2-year treatment with tiotropium in patients with COPD: a randomized trial. *Chest* 144: 490-497, 2013.
5. Guenette JA, Raghavan N, Harris-McAllister V, Preston ME, Webb KA and O'Donnell DE. Effect of adjunct fluticasone propionate on airway physiology during rest and exercise in COPD. *Respir Med* 105: 1836-1845, 2011.
6. Guenette JA, Webb KA and O'Donnell DE. Effect of fluticasone/salmeterol combination on dyspnea and respiratory mechanics in mild-to-moderate COPD. *Respir Med* 107: 708-716, 2013.
7. Magnussen H, Paggiaro P, Schmidt H, Kesten S, Metzdorf N and Maltais F. Effect of combination treatment on lung volumes and exercise endurance time in COPD. *Respir Med* 106: 1413-1420, 2012.

8. Maltais F, Celli B, Casaburi R, Porszasz J, Jarreta D, Seoane B and Caracta C. Acclidinium bromide improves exercise endurance and lung hyperinflation in patients with moderate to severe COPD. *Respir Med* 105: 580-587, 2011.
9. Man WD, Mustafa N, Nikolettou D, Kaul S, Hart N, Rafferty GF, Donaldson N, Polkey MI and Moxham J. Effect of salmeterol on respiratory muscle activity during exercise in poorly reversible COPD. *Thorax* 59: 471-476, 2004.
10. Neder JA, Fuld JP, Overend T, Thirlwell J, Carter R, Stevenson R and Ward SA. Effects of formoterol on exercise tolerance in severely disabled patients with COPD. *Respir Med* 101: 2056-2064, 2007.
11. O'Donnell DE, Casaburi R, Vincken W, Puente-Maestu L, Swales J, Lawrence D and Kramer B. Effect of indacaterol on exercise endurance and lung hyperinflation in COPD. *Respir Med* 105: 1030-1036, 2011.
12. O'Donnell DE, Sciruba F, Celli B, Mahler DA, Webb KA, Kalberg CJ and Knobil K. Effect of fluticasone propionate/salmeterol on lung hyperinflation and exercise endurance in COPD. *Chest* 130: 647-656, 2006.
13. O'Donnell DE, Voduc N, Fitzpatrick M and Webb KA. Effect of salmeterol on the ventilatory response to exercise in chronic obstructive pulmonary disease. *Eur Respir J* 24: 86-94, 2004.
14. van der Vaart H, Postma DS, Grevink R, Roemer W and ten HN. Bronchodilation improves endurance but not muscular efficiency in chronic obstructive pulmonary disease. *Int J Chron Obstruct Pulmon Dis* 6: 229-235, 2011.

15. Worth H, Forster K, Eriksson G, Nihlen U, Peterson S and Magnussen H. Budesonide added to formoterol contributes to improved exercise tolerance in patients with COPD. *Respir Med* 104: 1450-1459, 2010.
16. Yoshimura K, Maekura R, Hiraga T, Kitada S, Miki K, Miki M and Tateishi Y. Effects of tiotropium on sympathetic activation during exercise in stable chronic obstructive pulmonary disease patients. *Int J Chron Obstruct Pulmon Dis* 7: 109-117, 2012.
17. Zhang W, Fievez L, Zhang F, Cheu E, Antoine N, Delguste C, Zhang Y, Rong W, Bureau F, Advenier C and Gustin P. Effects of formoterol and ipratropium bromide on repeated cadmium inhalation-induced pulmonary inflammation and emphysema in rats. *Eur J Pharmacol* 647: 178-187, 2010.
18. Zhang X, Waterman LA, Ward J, Baird JC and Mahler DA. Advantages of endurance treadmill walking compared with cycling to assess bronchodilator therapy. *Chest* 137: 1354-1361, 2010.

**Figure 6: Relationships among the changes in iso-time IC, dyspnoea, and  $t_{LIM}$  after bronchodilators**

1. Beeh KM, Wagner F, Khindri S, Drollmann AF: Effect of indacaterol on dynamic lung hyperinflation and breathlessness in hyperinflated patients with COPD. *COPD* 2011;8:340-345.
2. Belman MJ, Botnick WC, Shin JW: Inhaled bronchodilators reduce dynamic hyperinflation during exercise in patients with chronic obstructive pulmonary disease. *Am J Respir Crit Care Med* 1996;153:967-975.
3. Guenette JA, Chin RC, Cory JM, Webb KA, O'Donnell DE: Inspiratory Capacity during Exercise: Measurement, Analysis, and Interpretation. *Pulm Med* 2013;2013:956081.

4. Maltais F, Hamilton A, Marciniuk D, Hernandez P, Sciurba FC, Richter K, Kesten S, O'Donnell D: Improvements in symptom-limited exercise performance over 8 h with once-daily tiotropium in patients with COPD. *Chest* 2005;128:1168-1178.
5. Maltais F, Celli B, Casaburi R, Porszasz J, Jarreta D, Seoane B, Caracta C: Acclidinium bromide improves exercise endurance and lung hyperinflation in patients with moderate to severe COPD. *Respir Med* 2011;105:580-587.
6. Man WD, Mustafa N, Nikolettou D, Kaul S, Hart N, Rafferty GF, Donaldson N, Polkey MI, Moxham J: Effect of salmeterol on respiratory muscle activity during exercise in poorly reversible COPD. *Thorax* 2004;59:471-476.
7. Neder JA, Fuld JP, Overend T, Thirlwell J, Carter R, Stevenson R, Ward SA: Effects of formoterol on exercise tolerance in severely disabled patients with COPD. *Respir Med* 2007;101:2056-2064.
8. O'Donnell DE, Voduc N, Fitzpatrick M, Webb KA: Effect of salmeterol on the ventilatory response to exercise in chronic obstructive pulmonary disease. *Eur Respir J* 2004;24:86-94.
9. O'Donnell DE, Fluge T, Gerken F, Hamilton A, Webb K, Aguilaniu B, Make B, Magnussen H: Effects of tiotropium on lung hyperinflation, dyspnoea and exercise tolerance in COPD. *Eur Respir J* 2004;23:832-840.
10. O'Donnell DE, Hamilton AL, Webb KA: Sensory-mechanical relationships during high-intensity, constant-work-rate exercise in COPD. *J Appl Physiol* 2006;101:1025-1035.
11. O'Donnell DE, Sciurba F, Celli B, Mahler DA, Webb KA, Kalberg CJ, Knobil K: Effect of fluticasone propionate/salmeterol on lung hyperinflation and exercise endurance in COPD. *Chest* 2006;130:647-656.



- 12 . O'Donnell DE, Casaburi R, Vincken W, Puente-Maestu L, Swales J, Lawrence D, Kramer B: Effect of indacaterol on exercise endurance and lung hyperinflation in COPD. *Respir Med* 2011;105:1030-1036.
- 13 . Peters MM, Webb KA, O'Donnell DE: Combined physiological effects of bronchodilators and hyperoxia on exertional dyspnoea in normoxic COPD. *Thorax* 2006;61:559-567.
- 14 . Worth H, Forster K, Eriksson G, Nihlen U, Peterson S, Magnussen H: Budesonide added to formoterol contributes to improved exercise tolerance in patients with COPD. *Respir Med* 2010;104:1450-1459.

**Figure 7. Change in Incremental Shuttle Walking Test distance in a selection of studies using ISWT as an outcome following rehabilitation**

1. Deacon SJ, Vincent EE, Greenhaff PL, Fox J, Steiner MC, Singh SJ and Morgan MD. Randomized controlled trial of dietary creatine as an adjunct therapy to physical training in chronic obstructive pulmonary disease. *Am J Respir Crit Care Med* 178: 233-239, 2008.
2. Dodd JW, Hogg L, Nolan J, Jefford H, Grant A, Lord VM, Falzon C, Garrod R, Lee C, Polkey MI, Jones PW, Man WD and Hopkinson NS. The COPD assessment test (CAT): response to pulmonary rehabilitation. A multicentre, prospective study. *Thorax* 66: 425-429, 2011.
3. Garrod R, Paul EA and Wedzicha JA. Supplemental oxygen during pulmonary rehabilitation in patients with COPD with exercise hypoxaemia. *Thorax* 55: 539-543, 2000.
4. Griffiths TL, Burr ML, Campbell IA, Lewis-Jenkins V, Mullins J, Shiels K, Turner-Lawlor PJ, Payne N, Newcombe RG, Ionescu AA, Thomas J and Tunbridge J. Results at 1 year of outpatient

multidisciplinary pulmonary rehabilitation: a randomised controlled trial. *Lancet* 355: 362-368, 2000.

5. Holland AE, Spruit MA, Troosters T, Puhan MA, Pepin V, Saey D, McCormack MC, Carlin BW, Sciruba FC, Pitta F, Wanger J, MacIntyre N, Kaminsky DA, Culver BH, Reville SM, Hernandez NA, Andrianopoulos V, Camillo CA, Mitchell KE, Lee AL, Hill CJ and Singh SJ. An official European Respiratory Society/American Thoracic Society technical standard: field walking tests in chronic respiratory disease. *Eur Respir J* 44: 1428-1446, 2014.

6. Jones SE, Green SA, Clark AL, Dickson MJ, Nolan AM, Moloney C, Kon SS, Kamal F, Godden J, Howe C, Bell D, Fleming S, Haselden BM and Man WD. Pulmonary rehabilitation following hospitalisation for acute exacerbation of COPD: referrals, uptake and adherence. *Thorax* 69: 181-182, 2014.

7. Kon SS, Canavan JL, Nolan CM, Clark AL, Jones SE, Cullinan P, Polkey MI and Man WD. The 4-metre gait speed in COPD: responsiveness and minimal clinically important difference. *Eur Respir J* 2013.

8. Leung RW, Alison JA, McKeough ZJ and Peters MJ. Ground walk training improves functional exercise capacity more than cycle training in people with chronic obstructive pulmonary disease (COPD): a randomised trial. *J Physiother* 56: 105-112, 2010.

9. Liu WT, Wang CH, Lin HC, Lin SM, Lee KY, Lo YL, Hung SH, Chang YM, Chung KF and Kuo HP. Efficacy of a cell phone-based exercise programme for COPD. *Eur Respir J* 32: 651-659, 2008.

10. Man WD, Polkey MI, Donaldson N, Gray BJ and Moxham J. Community pulmonary rehabilitation after hospitalisation for acute exacerbations of chronic obstructive pulmonary disease: randomised controlled study. *BMJ* 329: 1209, 2004.

11. Moore J, Fiddler H, Seymour J, Grant A, Jolley C, Johnson L and Moxham J. Effect of a home exercise video programme in patients with chronic obstructive pulmonary disease. *J Rehabil Med* 41: 195-200, 2009.
12. Revitt O, Sewell L, Morgan MD, Steiner M and Singh S. Short outpatient pulmonary rehabilitation programme reduces readmission following a hospitalization for an exacerbation of chronic obstructive pulmonary disease. *Respirology* 18: 1063-1068, 2013.
13. Sewell L, Singh SJ, Williams JE, Collier R and Morgan MD. Can individualized rehabilitation improve functional independence in elderly patients with COPD? *Chest* 128: 1194-1200, 2005.
14. Seymour JM, Moore L, Jolley CJ, Ward K, Creasey J, Steier JS, Yung B, Man WD, Hart N, Polkey MI and Moxham J. Outpatient pulmonary rehabilitation following acute exacerbations of COPD. *Thorax* 65: 423-428, 2010.
15. Singh SJ, Jones PW, Evans R and Morgan MD. Minimum clinically important improvement for the incremental shuttle walking test. *Thorax* 63: 775-777, 2008.
16. Singh SJ, Puhan MA, Andrianopoulos V, Hernandez NA, Mitchell KE, Hill CJ, Lee AL, Camillo CA, Troosters T, Spruit MA, Carlin BW, Wanger J, Pepin V, Saey D, Pitta F, Kaminsky DA, McCormack MC, MacIntyre N, Culver BH, Sciurba FC, Revill SM, Delafosse V and Holland AE. An official systematic review of the European Respiratory Society/American Thoracic Society: measurement properties of field walking tests in chronic respiratory disease. *Eur Respir J* 44: 1447-1478, 2014.

## Figure 8. Improvement in ESWT performance (time, s) in COPD patients following pulmonary rehabilitation

1. Albores J, Marolda C, Haggerty M, Gerstenhaber B and ZuWallack R. The use of a home exercise program based on a computer system in patients with chronic obstructive pulmonary disease. *J Cardiopulm Rehabil Prev* 33: 47-52, 2013.
2. Altenburg WA, de Greef MH, ten Hacken NH and Wempe JB. A better response in exercise capacity after pulmonary rehabilitation in more severe COPD patients. *Respir Med* 106: 694-700, 2012.
3. Eaton T, Young P, Nicol K and Kolbe J. The endurance shuttle walking test: a responsive measure in pulmonary rehabilitation for COPD patients. *Chron Respir Dis* 3: 3-9, 2006.
4. Evans RA, Singh SJ, Collier R, Loke I, Steiner MC and Morgan MD. Generic, symptom based, exercise rehabilitation; integrating patients with COPD and heart failure. *Respir Med* 104: 1473-1481, 2010.
5. Leung RW, Alison JA, McKeough ZJ and Peters MJ. Ground walk training improves functional exercise capacity more than cycle training in people with chronic obstructive pulmonary disease (COPD): a randomised trial. *J Physiother* 56: 105-112, 2010.
6. Liddell F and Webber J. Pulmonary rehabilitation for chronic obstructive pulmonary disease: a pilot study evaluating a once-weekly versus twice-weekly supervised programme. *Physiotherapy* 96: 68-74, 2010.
7. Linneberg A, Rasmussen M, Buch TF, Wester A, Malm L, Fannikke G and Vest S. A randomised study of the effects of supplemental exercise sessions after a 7-week chronic obstructive pulmonary disease rehabilitation program. *Clin Respir J* 6: 112-119, 2012.

8. McKeough ZJ, Leung RW and Alison JA. Shuttle walk tests as outcome measures: Are two incremental shuttle walk tests and two endurance shuttle walk tests necessary? *Am J Phys Med Rehabil* 90: 35-39, 2011.
9. Revill SM, Morgan MD, Singh SJ, Williams J and Hardman AE. The endurance shuttle walk: a new field test for the assessment of endurance capacity in chronic obstructive pulmonary disease. *Thorax* 54: 213-222, 1999.
10. Ringbaek T, Brondum E, Martinez G and Lange P. Rehabilitation in COPD: the long-term effect of a supervised 7-week program succeeded by a self-monitored walking program. *Chron Respir Dis* 5: 75-80, 2008.
11. Ringbaek T, Martinez G, Brondum E, Thogersen J, Morgan M and Lange P. Shuttle walking test as predictor of survival in chronic obstructive pulmonary disease patients enrolled in a rehabilitation program. *J Cardiopulm Rehabil Prev* 30: 409-414, 2010.
12. Vest S, Moll L, Petersen M, Buch TF, Bruun DM, Rask M, Wester A and Linneberg A. Results of an outpatient multidisciplinary COPD rehabilitation programme obtained in two settings: primary and secondary health care. *Clin Respir J* 5: 84-91, 2011.
13. Waterhouse JC, Walters SJ, Oluboyede Y and Lawson RA. A randomised 2 x 2 trial of community versus hospital pulmonary rehabilitation, followed by telephone or conventional follow-up. *Health Technol Assess* 14: i-xi, 1, 2010.
